# Supplementary material
Source: ML conference proceedings conference paper supplement (https://openaccess.thecvf.com/content/ICCV_2019/html/Mall_GeoStyle_Discovering_Fashion_ICCV_2019_paper.html)
Supplement: Supplementary file 1 [file Mall_GeoStyle_Discovering_Fashion_ICCV_2019_supplemental.pdf]

# Supplementary Material for: “GeoStyle: Discovering Fashion Trends and Events”

In Section 1 we describe the reasoning we did when choosing the parameter values for the grouping cost function. Section 2 shows the results of in-sample predictions of our method vs. other baselines. In Section 3 we show the results of running our framework on pairwise combinations of attributes. In Section 4 we show the performance of our framework on long-range prediction. Section 5 extends the interpretability example we show in the main paper. Section 6 presents the top-100 events discovered by attribute-trend based event detection and style-trend based event detection. Section 7 presents the topmost style-trend based events for each city. Finally, in Section 8 we show some of the results for trend fitting and prediction.

## 1. Parameter values for grouping cost function

We set  $d_{\max} = 5$ , as the Lunisolar calendar can drift a maximum of five weeks away from the Solar calendar[1].

We arrived at the value of  $\delta_{\max}$  as follows. We experimented with a range of values for  $\delta_{\max}$ , from  $1 \cdots 5$ . We give a grouping with  $\delta_{\max} = k$  an improvement score  $s$ , if it was able to group an extra  $s$  events compared to when  $\delta_{\max} = k - 1$ .

We found the value  $s$  by finding events consisting of a pair of weeks which are not grouped when  $\delta_{\max} = k - 1$  and grouped when  $\delta_{\max} = k$ . Out of these sets of pair of weeks we find the pairs with non-zero intersection in the top-5 keywords. Note that this keyword matching is an approximation of  $s$  score because there is a possibility that no keyword matches even though both outliers are caused by the same event. After  $\delta_{\max} = 2$ ,  $s$  drops to zero. Hence, we chose  $\delta_{\max} = 2$ , allowing only consecutive weeks to be grouped together.

We decided upon  $b$  and  $c$  in the following way.  $b, c$  affect the ordering of grouped events vs singleton events. Since singleton events (say  $e_s$ ) will have a value of  $C_T(e_s) = 1$  and for grouped events (say  $e_g$ ) this value is  $< 1$ , even with  $\bar{v}_{e_s} = \bar{v}_{e_g}$  the grouped event will be more salient. As  $b, c$  values increase, the slope of the linear functions decreases, and the saliency of grouped events decreases relative to singleton event. So we choose a large value for  $b$  and  $c$ . We choose  $c = 18$  and  $b = 15$ , which are large enough to not change the ordering with the increment.

| Fit function | MAE                    | MAPE                                |
|--------------|------------------------|-------------------------------------|
|              | $\sum_t  f(t) - T(t) $ | $\sum_t \frac{ f(t) - T(t) }{T(t)}$ |
| linear       | 0.0282                 | 21.68                               |
| sinusoid     | 0.0152                 | 15.71                               |
| sin+linear   | 0.0151                 | 15.56                               |
| cyclic       | 0.0150                 | 15.42                               |
| ours         | <b>0.0131</b>          | <b>14.38</b>                        |

Table 1: Comparison of our fitting function against baselines by in-sample errors.

## 2. In-sample predictions for ours vs other baselines

Table 1 shows the in-sample performance of our method against other baselines for attribute trends. Not only does our method perform better than other baselines, the errors are not very far from the the out-of-sample errors. This shows that our method could forecast robustly for a longer range of time periods.

## 3. Trends and events with pairwise attributes

In addition to doing our analysis on the attributes and discovered styles, we run our pipeline on the pairwise combinations of attributes. Pairwise combination of attributes results in quadratically more computations with the number of attributes. 46 different attributes result in 1035 different pairwise combinations of these attributes. Since all these attribute combinations will not be equally popular (for example it is very unlikely that someone would wear a necktie with a dress) we do our analysis on top-200 most popular attribute combinations. For binary attributes, we only consider when the attribute has a positive value. For example, “wearing a suit with a necktie” is considered as a valid combination but “not wearing a scarf with a dress” is not considered.

Table 3 shows the performance of our trend-fitting method against the baseline methods on pairwise combinations of attributes. Our method beats the baselines in long-range forecast and is very very close to vector autoregression in short-range forecast. Table 2 shows the top five events detected by

|                                                                                                             |                                                                                   |                                                                                   |                                                                                   |                                                                                     |                                                                                     |
|-------------------------------------------------------------------------------------------------------------|-----------------------------------------------------------------------------------|-----------------------------------------------------------------------------------|-----------------------------------------------------------------------------------|-------------------------------------------------------------------------------------|-------------------------------------------------------------------------------------|
| <b>Images</b><br><b>City</b><br><b>Attribute 1</b><br><b>Attribute 2</b><br><b>Month</b><br><b>Keywords</b> |  |  |  |  |  |
|                                                                                                             |  |  |  |  |  |
|                                                                                                             | Bangkok                                                                           | Bangkok                                                                           | Chicago                                                                           | Bangkok                                                                             | Moscow                                                                              |
|                                                                                                             | Yellow color                                                                      | Short sleeve                                                                      | Red color                                                                         | No collar                                                                           | Wearing hat                                                                         |
|                                                                                                             | Solid pattern                                                                     | Yellow color                                                                      | short sleeve                                                                      | T-shirt                                                                             | Outerwear                                                                           |
| 2014 Dec, 2015 Dec                                                                                          | 2014 Dec, 2015 Dec                                                                | 2014 Jun                                                                          | 2014 Apr                                                                          | Jan 2014, Jan 2015, Jan 2016                                                        |                                                                                     |
| father, happy                                                                                               | dad, father                                                                       | cup, stanleycup                                                                   | songkran, festival                                                                | newyear, winter                                                                     |                                                                                     |

Table 2: Top five events detected across the world by finding anomalous behaviour in trends over pairwise attributes.

| Model    | Next week     |              | Next 26 weeks |              |
|----------|---------------|--------------|---------------|--------------|
|          | MAE           | MAPE         | MAE           | MAPE         |
| mean     | 0.0199        | 23.78        | 0.0324        | 58.04        |
| last     | 0.0138        | 18.42        | 0.0309        | 49.81        |
| AR       | 0.0140        | 18.09        | 0.0283        | 48.18        |
| VAR      | <b>0.0109</b> | 16.44        | 0.0240        | 41.67        |
| ES       | 0.0137        | 18.06        | 0.0308        | 49.87        |
| linear   | 0.0295        | 27.52        | 0.0380        | 57.15        |
| sinusoid | 0.0133        | 16.96        | 0.0167        | 25.26        |
| sin+lin  | 0.0134        | 17.09        | 0.0171        | 26.72        |
| cyclic   | 0.0122        | 16.30        | 0.0187        | 27.91        |
| Ours     | 0.0112        | <b>14.96</b> | <b>0.0146</b> | <b>23.12</b> |

Table 3: Comparison of our model against baselines for trends over pairwise attribute combinations.

| Model    | Next 52 weeks |              |
|----------|---------------|--------------|
|          | MAE           | MAPE         |
| mean     | 0.0292        | 27.63        |
| last     | 0.0325        | 29.44        |
| AR       | 0.0234        | 23.46        |
| VAR      | 0.0258        | 25.83        |
| ES       | 0.0310        | 27.89        |
| linear   | 0.0304        | 25.50        |
| sinusoid | 0.0175        | 18.33        |
| sin+lin  | 0.0180        | 19.01        |
| cyclic   | 0.0179        | 18.70        |
| Ours     | <b>0.0164</b> | <b>17.79</b> |

Table 4: Comparison of our model against baselines for trends over next 52 weeks.

using pairwise attribute combinations. Major events detected by our pipeline on single attributes are also getting detected when combinations of attributes are used.

#### 4. Long-term trend forecasting

Table 5 shows the performance of our method when predicting over a longer duration of time with our method. We forecast over the last 1 year, with models trained over first 2 years. Our method performs better when compared to all the baseline models.

#### 5. Interpreting phase difference

As discussed in the main paper, the parameters of our model are interpretable and could be used to reveal insights. Since  $\phi$  models the phase of cyclical spikes and  $\text{sgn}(m_{\text{cyc}})$  (sign of  $m_{\text{cyc}}$ ) models whether the spikes are upward or downward-facing.  $\text{sgn}(m_{\text{cyc}})\pi + \phi$  can be interpreted as

the metric modeling where the maxima occur annually for a trend. Figure 5 in the main paper only looked at cities with *positive* spikes. We extend that analysis now to all 44 cities using absolute difference in  $\text{sgn}(m_{\text{cyc}})\pi + \phi$  instead. Figure 1 shows the pairwise absolute difference between this metric for all 44 cities for wearing multiple layers. Because multiple layers are worn usually during winters, cities in each hemisphere form a cluster amongst themselves.

#### 6. Top 200 events sorted by saliency

Table 6 and 7 show the top 100 events discovered by our method across the worlds using attribute-trends and style-trends respectively. We show the top-5 words associated with the events instead of top-2 (unlike the main paper), as reasons for some events with lower saliency could be found in top-5 keywords but not in top-2.

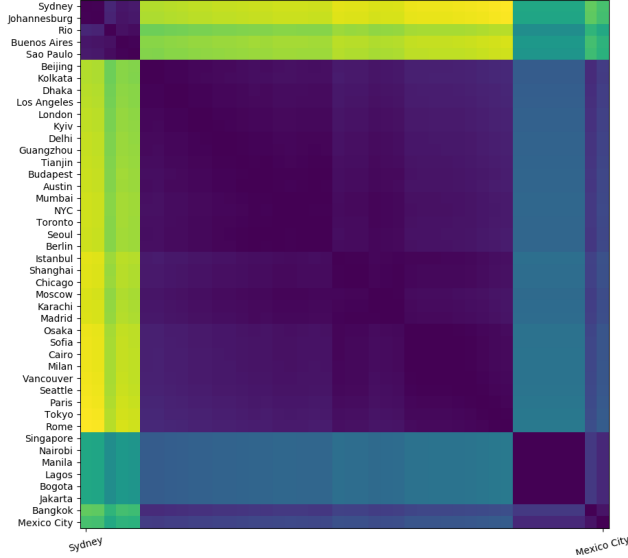

Figure 1: Pairwise difference for the multiple-layered attribute between 44 cities, using the metric  $\text{sgn}(m_{\text{cyc}})\pi + \phi$ .

| Model    | Next 52 weeks |              |
|----------|---------------|--------------|
|          | MAE           | MAPE         |
| mean     | 0.0292        | 27.63        |
| last     | 0.0325        | 29.44        |
| AR       | 0.0234        | 23.46        |
| VAR      | 0.0258        | 25.83        |
| ES       | 0.0310        | 27.89        |
| linear   | 0.0304        | 25.50        |
| sinusoid | 0.0175        | 18.33        |
| sin+lin  | 0.0180        | 19.01        |
| cyclic   | 0.0179        | 18.70        |
| Ours     | <b>0.0164</b> | <b>17.79</b> |

Table 5: Comparison of our model against baselines for trends over next 52 weeks.

## 7. Events discovered for each city by style-trends

Figure 2,3,4 and 5 show the major events with most descriptive keywords for all the cities (Except Lagos, Johannesburg, Nairobi and Sydney, which are shown in the main paper). The styles successfully capture the combinations of attributes for example, jackets without ties in Seoul and jackets with ties in Tokyo. Another thing to note is that in places like Milan and Jakarta people are not dressing according to what they would conventionally wear during Thanksgiving or Christmas respectively. Instead, people go out more during these festivals and wear clothes that they normally wear while going out.

## 8. Trend fitting and predictions

Figure 6 shows some of the results of our trend fitting and prediction. The blue curve shows the empirical trend we observe from the data after recognition. The red curve shows the fit and prediction over the next year from our method. Other colors show the baselines fit and/or predictions from linear fit (yellow), exponential smoothing (magenta) and auto-regression (cyan).





| Images                                                                              | City        | Attribute       | Event week                | Top-5 words in caption                                               |
|-------------------------------------------------------------------------------------|-------------|-----------------|---------------------------|----------------------------------------------------------------------|
|    | Seattle     | Dress           | 2014-44                   | halloween, freaknight, freaknight2014, happyhalloween, halloween2014 |
|    | Bogota      | Yellow          | 2014-24                   | mundial, seleccin, colombia, eres, yo                                |
|    | Bangkok     | Multiple layers | 2016-04                   | amado, nora, winter, cold, led-er                                    |
|    | Paris       | Long sleeve     | 2014-28                   | haute couture, couture, haute, chanelcouture, parisfashion-week      |
|    | Moscow      | No sleeve       | 2014-31, 2014-32          | summer, redsquare, man, sea, starlite                                |
|    | Moscow      | Long sleeve     | 2014-26, 2015-29          | bnw, summer, summertime, photojournalism, parklive                   |
|    | Bangkok     | Graphics        | 2014-16, 2015-16          | songkran, festival, songkranfestival, wet, songkarn                  |
|   | Kyiv        | No sleeve       | 2015-24                   | olgalomaka, university, vcg, themindparasites, master                |
|  | Bangkok     | Red             | 2014-05, 2015-08, 2016-06 | chinese, year, valentine, happy, happychinesenewyear                 |
|  | Bangkok     | Outerwear       | 2016-04                   | winter, cold, nora, portrait, the-outerproject                       |
|  | Moscow      | No sleeve       | 2014-21, 2014-23          | park, may, bazaar, summer, evening                                   |
|  | Moscow      | Tank top        | 2014-30, 2014-31          | summer, sunny, sun, me, you                                          |
|  | Chicago     | Graphics        | 2015-25                   | cup, hn, stanley, stanley, dynasty                                   |
|  | Jakarta     | Red             | 2014-05                   | cny, chinese, pinggul, lingkar, year                                 |
|  | Vancouver   | Dress           | 2014-44                   | halloween, happyhalloween, costume, halloween2014, costumes          |
|  | Los Angeles | Long sleeve     | 2015-19, 2015-20, 2015-21 | dragcon, uscgrad, classof2015, graduation, rupaulsdragcon            |
|  | Kyiv        | Long sleeve     | 2014-26                   | master, konvorablyk, okeanelzy, graduation, citybeachclub            |
|  | Istanbul    | Short sleeve    | 2015-39                   | bayram, bayramlar, purgatory-istanbul, avclar, iyibayramlar          |

| Images                                                                              | City         | Attribute          | Event week       | Top-5 words in caption                                              |
|-------------------------------------------------------------------------------------|--------------|--------------------|------------------|---------------------------------------------------------------------|
|    | Los Angeles  | Multiple layers    | 2015-20          | uscgrad, dragcon, salvador, ecommerce, classof2015                  |
|    | Buenos Aires | Short sleeve       | 2014-34          | philips, thevamps, thesouth, ptywonderland, goprobrasill            |
|    | Buenos Aires | One layer          | 2014-43          | toque, meias, livraria, sim, senortango                             |
|    | Berlin       | Outerwear          | 2015-31          | dey, eps, sharing, became, they                                     |
|    | Paris        | Wearing jacket     | 2014-28          | haute couture, couture, australia, pela, parish haute couture       |
|    | Delhi        | Outerwear          | 2014-51, 2014-52 | christmas, merry, winter, winters, santa                            |
|    | Moscow       | Outerwear          | 2014-25, 2014-26 | dryn the city, drydry, river, summer, um                            |
|    | Bangkok      | Purple             | 2015-14          | bikini, you, milin, in, zaapon-sale                                 |
|   | Istanbul     | T-shirt            | 2015-39          | hdr, bayram, purgatory istanbul, bayramlar, avclar                  |
|  | Buenos Aires | One layer          | 2014-34          | thevamps, buenos aires strip, philips, gopro brasill, selfie go-pro |
|  | Moscow       | Tank top           | 2014-32          | russian, we, vscomoscow, skateboarding, skateboard                  |
|  | Paris        | Multiple layers    | 2014-28, 2015-31 | haute couture, couture, mini, july, pfw                             |
|  | Delhi        | Wearing jacket     | 2014-51, 2014-52 | christmas, merry, winter, winters, santa                            |
|  | Buenos Aires | Not wearing jacket | 2014-43          | meias, livraria, toque, sim, senortango                             |
|  | Moscow       | One layer          | 2014-21, 2014-23 | linkin park, bosco fresh fest, bw, park, may                        |
|  | Moscow       | Tank top           | 2014-21, 2014-23 | instasize, park, evening, hall, like                                |
|  | London       | Wearing hat        | 2013-52          | christmas, merry, xmas, jag, att                                    |
|  | Rome         | Wearing scarf      | 2015-01          | capodanno, year, cold, new, last                                    |

| Images                                                                              | City         | Attribute          | Event week                | Top-5 words in caption                                            |
|-------------------------------------------------------------------------------------|--------------|--------------------|---------------------------|-------------------------------------------------------------------|
|    | Toronto      | Not wearing jacket | 2015-19                   | cmw2015, mothers, tcaf, mothersday, mother                        |
|    | Buenos Aires | Wearing glasses    | 2015-02                   | formulae, frias, monument, out, of                                |
|    | Bangkok      | Blue               | 2015-33                   | bikeformom, mother, mom, bike, queen                              |
|    | Seattle      | Graphics           | 2014-05, 2015-05          | superbowl, sb49, bluefriday, bowl, gohawks                        |
|    | Seoul        | Wearing scarf      | 2013-38                   | glamjourneys, glam, breakfast, awesomazingtrips, awesomazingkorea |
|    | London       | No sleeve          | 2014-30, 2015-27          | picnic, park, hyde, seaside, wimbledon                            |
|    | Seattle      | Wearing hat        | 2014-06                   | parade, celebrate48, seahawks, 12thman, champions                 |
|    | Buenos Aires | Wearing glasses    | 2015-01                   | virada, goprohero3, maravilhoso, foi, worldclub                   |
|   | Delhi        | Multiple layers    | 2014-51, 2014-52          | christmas, merry, winters, santa, winter                          |
|  | Toronto      | One layer          | 2015-19                   | cmw2015, mothers, tcaf, mothersday, mother                        |
|  | Los Angeles  | Wearing jacket     | 2015-20                   | uscgrad, dragcon, salvador, ecommerce, delta                      |
|  | Berlin       | Wearing jacket     | 2014-34, 2015-31          | hercules, interrail, august, reunited, bln2014                    |
|  | Rome         | Short sleeve       | 2014-41, 2014-42          | granfondo, statigram, instahub, breakfast, jj                     |
|  | Istanbul     | Wearing hat        | 2013-50, 2015-01, 2015-02 | kar, snow, siyah, instapic, winter                                |
|  | Berlin       | Not wearing jacket | 2014-21                   | brumfitt, berlinbiennale, goat, exam, swan                        |
|  | Berlin       | Long sleeve        | 2014-34, 2015-31          | hercules, bln2014, dey, aug, interrail                            |
|  | Moscow       | Not wearing jacket | 2014-21, 2014-23          | linkinpark, boscofreshfest, bw, park, may                         |
|  | London       | One layer          | 2015-27                   | wireless, wimbledon, wireless-festival, independenceday, iftar    |



| Images                                                                              | City         | Attribute          | Event week                         | Top-5 words in caption                                                     |
|-------------------------------------------------------------------------------------|--------------|--------------------|------------------------------------|----------------------------------------------------------------------------|
|    | Berlin       | Multiple layers    | 2014-34, 2015-31                   | hercules, interrail, august, schultheiss, beutel                           |
|    | Tokyo        | No sleeve          | 2014-44                            | halloween, happyhalloween, halloween2014, missinternational2014, cooljapan |
|    | Berlin       | One layer          | 2014-21                            | brumfitt, berlinbiennale, goat, exam, swan                                 |
|    | Vancouver    | Tank top           | 2014-34                            | seawheeze, vansweaty, half, marathon, seawheeze2014                        |
|    | Buenos Aires | Not wearing jacket | 2014-34                            | thevamps, buenosairestrip, philips, goprobrasill, selfiego-pro             |
|    | Osaka        | Not wearing jacket | 2015-18, 2015-19                   | gw, aktr, goldenweek, electrox, bicycle                                    |
|    | Kyiv         | Suit               | 2014-09                            | yanukovich, die, rochas, moscow, lecture                                   |
|    | Austin       | Wearing glasses    | 2013-40, 2013-41, 2014-40, 2015-41 | acl, aclfest, austincitylimits, acl2013, aclfestival                       |
|   | Buenos Aires | Wearing glasses    | 2015-03                            | patos, ferias, verano2015, mavtips, picoftheday                            |
|  | Moscow       | Black              | 2014-26                            | june, xtcnyj, wu, wagner, uboat                                            |
|  | Austin       | Wearing scarf      | 2013-48                            | thanksgiving, thankful, game, sisters, me                                  |
|  | Moscow       | Wearing scarf      | 2014-01, 2015-02                   | fun, winter, instalike, tagsforlikes, yo                                   |
|  | Singapore    | Suit               | 2015-21                            | npgraduation2015, graduation, poly, years, graduated                       |
|  | Rio          | Plaid              | 2015-26                            | ficacomigo, festajunina, eva, niver, fica                                  |
|  | Istanbul     | One layer          | 2015-39                            | bayram, bayramlar, purgatory-istanbul, iyibayramlar, avclar                |
|  | Toronto      | Short sleeve       | 2015-19                            | tcac, mothersday, mother, mothers, sportinglife10k                         |
|  | Toronto      | Dress              | 2014-44                            | halloween, happyhalloween, costume, halloween2014, costumes                |
|  | Berlin       | Wearing jacket     | 2015-25, 2015-26                   | coffeeme, rosabaya, derblumigfruchtige, nespresso, arpeggio                |

| Images                                                                              | City    | Attribute     | Event week       | Top-5 words in caption                                                         |
|-------------------------------------------------------------------------------------|---------|---------------|------------------|--------------------------------------------------------------------------------|
|    | Tokyo   | Outerwear     | 2015-01          | year, il, happynewyear, alla, newyear                                          |
|    | Beijing | Graphics      | 2015-35          | beijing2015, t9, com, na, de                                                   |
|    | Berlin  | Wearing scarf | 2015-01          | year, snow, neve, new, berlim                                                  |
|    | Moscow  | Solid         | 2014-26          | parklive, topmodelbygaga-worldmodels, podwallbar, modelsschool, tfp            |
|   | Bangkok | Red           | 2015-52          | christmas, merry, mas, sleeve, merrychristmas                                  |
|  | Paris   | Outerwear     | 2014-28, 2015-31 | haute couture, couture, pela, july, created                                    |
|  | Tokyo   | Dress         | 2014-44          | halloween, happyhalloween, missinternational2014, tricko-rtreat, halloween2014 |
|  | Kyiv    | Wearing scarf | 2015-42          | autumn, spain, bracken, foot-ball, it                                          |
|  | Milan   | Dress         | 2015-09          | mfw, fw15, milanfashionweek, mfw15, fashionweek                                |
|  | Manila  | T-shirt       | 2014-01          | newyear, happynewyear, eve, newyear2014, pesos                                 |

Table 6: Top 100 events detected across the world by finding anomalous behaviour in attribute trends. The words from captions are sorted by their TF-IDF scores in the event week. Images from each event are sorted by the number of words matching with the top-5 keywords



| Images                                                                              | City      | Event week                                  | Top-5 words in caption                                             |
|-------------------------------------------------------------------------------------|-----------|---------------------------------------------|--------------------------------------------------------------------|
|    | Bangkok   | 2014-49, 2015-49, 2015-50                   | dad, father, bike, bikefordad, day                                 |
|    | Rio       | 2014-24, 2014-25, 2014-26, 2014-27, 2014-28 | worldcup, copa, brasil, copadomundo, torcida                       |
|    | Sao Paulo | 2014-24, 2014-25, 2014-26, 2014-27          | worldcup, vaibrasil, copa, brasil, worldcup2014                    |
|    | Austin    | 2013-40, 2013-41, 2014-40, 2014-41, 2015-41 | acl, aclfest, aclfestival, austincitylimits, music                 |
|    | Madrid    | 2015-14                                     | alcal, demadridalcielo, puerta, than, more                         |
|    | Moscow    | 2014-01, 2015-01, 2015-02, 2016-01          | winter, newyear, new, christmas, year                              |
|    | Istanbul  | 2015-39                                     | bayramlar, fotoraf, falan, avclar, voodoo                          |
|    | Jakarta   | 2014-05                                     | chinese, year, xi, gong, cny                                       |
|   | Vancouver | 2015-52                                     | christmas, merry, holidays, merrychristmas, jardinsdeparis         |
|  | Austin    | 2015-37                                     | game, longhorns, hookem, football, hook                            |
|  | Rome      | 2013-48                                     | thanksgiving, xtreme, think, temple, sorryjoeforcuttingoffyourface |
|  | Austin    | 2015-12, 2016-11                            | sxsw, sxsw2016, sxsw2015, live, ran                                |
|  | Austin    | 2014-11                                     | sxsw, sxsw2014, sxsw14, band, music                                |
|  | Madrid    | 2014-03                                     | sido, seorita, rush, pornoortografa, nikilauda                     |
|  | Seattle   | 2015-11                                     | lucky2015, dash, st, rave, luckysea                                |
|  | Kolkata   | 2013-41                                     | parikrama, puja, durgapuja, durga, festival                        |
|  | Moscow    | 2014-01, 2015-02, 2016-01                   | newyear, winter, gum, redsquare, rink                              |
|  | Bangkok   | 2014-21                                     | scott, set, man, woman, freesize                                   |

| Images                                                                              | City      | Event week       | Top-5 words in caption                                           |
|-------------------------------------------------------------------------------------|-----------|------------------|------------------------------------------------------------------|
|    | Sao Paulo | 2015-04, 2016-06 | carnaval, favorvel, tranquilo, good, dessa                       |
|    | Kyiv      | 2014-09          | yanukovich, kiev, ukraine                                        |
|    | Moscow    | 2014-26          | walk, super, day, girls, with                                    |
|    | Budapest  | 2015-01          | beautiful, side, river, winter, newyear                          |
|    | Paris     | 2015-27          | way, vogue, lovely, july, from                                   |
|    | Nairobi   | 2015-30          | ges2015kenya, obama, potus, ges2015, president                   |
|    | Tokyo     | 2016-12          | graduation, photo, thank, university, rikkyo                     |
|    | Jakarta   | 2014-40          | batik, national, day, nasional, kenyang                          |
|   | Moscow    | 2014-23          | woman, vsco, like, followme, beautiful                           |
|  | Kolkata   | 2014-17          | statue, shiva, parvati, mantra, lordganesha                      |
|  | Paris     | 2014-28          | haute couture, good, modeling, aftershow, gopro                  |
|  | Tokyo     | 2015-32          | vol, instapic, ykykwedding, travelgram, tourist                  |
|  | Istanbul  | 2015-02          | standing, sevgiler, geceler, eyp, corner                         |
|  | Kyiv      | 2015-21          | happy, girls, with, white, relax                                 |
|  | Rio       | 2015-26          | ficacomigo, festajunina, eva, niver, sobre                       |
|  | Austin    | 2014-50, 2015-50 | christmas, formal, party, tx, been                               |
|  | Seattle   | 2014-44          | halloween, freaknight, freaknight2014, happyhalloween, halloweek |
|  | Seattle   | 2014-06, 2015-04 | celebrate48, parade, seahawks, bowl, marinersff                  |

| Images                                                                              | City      | Event week | Top-5 words in caption                           |
|-------------------------------------------------------------------------------------|-----------|------------|--------------------------------------------------|
|    | Kolkata   | 2013-34    | seriouslook, randomclick, rakhi, jatt, instafame |
|    | Jakarta   | 2014-25    | electro, electrorun, run, glow, set              |
|    | Sao Paulo | 2015-37    | municipal, face, ministro, direito, vamos        |
|    | Bogota    | 2013-44    | halloween, modelo, blue, red, kids               |
|    | Seattle   | 2013-45    | pic, morning, place, tour, big                   |
|    | Bangkok   | 2015-04    | l34, b40, dd, gray, smile                        |
|    | Seoul     | 2016-12    | seoulfashionweek, 2016fw, sfw, ddp, fashion      |
|    | Istanbul  | 2016-15    | gece, biz, senden, imdi, btn                     |
|   | Chicago   | 2015-25    | cup, stanleycup, stanley, parade, champions      |
|  | Budapest  | 2015-14    | spring, today, midnight, some, walk              |
|  | Berlin    | 2015-23    | uclfinal, league, juventus, juvefcb, go          |
|  | Seattle   | 2015-50    | holiday, party, guys, them, these                |
|  | Rome      | 2014-15    | rodjendan, gf, day2, by, glam                    |
|  | Kyiv      | 2014-36    | where, travel, this, so, city                    |
|  | Osaka     | 2014-44    | halloween, loofah, colorful, ariel, amemura      |
|  | Tokyo     | 2015-01    | year, new, day, sale, happiness                  |
|  | Nairobi   | 2014-14    | house, after, live, the                          |
|  | Bangkok   | 2015-08    | chinese, year, b2, new, dragon                   |



| Images                                                                              | City      | Event week                | Top-5 words in caption                              |
|-------------------------------------------------------------------------------------|-----------|---------------------------|-----------------------------------------------------|
|    | Sydney    | 2014-45                   | melbournecup, melbourne, cup, race, races           |
|    | Moscow    | 2014-21, 2014-23          | may, happy, friends, star, park                     |
|    | Paris     | 2015-49                   | cop21, climate, at, change, of                      |
|    | Bangkok   | 2015-37                   | samarnmitr58, here, tpcback2school, asia, are       |
|    | Sydney    | 2014-39                   | listen, surry, sleepout, sash, nightlife            |
|    | Austin    | 2013-48                   | thanksgiving, thankful, longhorns, football, turkey |
|    | Kyiv      | 2013-50                   | euromaidan, euromajdan, winter, my, europe          |
|    | Paris     | 2014-38                   | da, oh, ver, tudo, maison                           |
|   | Lagos     | 2013-52                   | christmas, merry, black, live, family               |
|  | Rome      | 2013-47                   | hold, between, re, amore, europe                    |
|  | Bogota    | 2013-36                   | colombia, toda, familia, vamos, ganar               |
|  | Rio       | 2015-01                   | ano, happynewyear, vem2015, reveillon, primeiro     |
|  | Jakarta   | 2014-30                   | best, god, back, team, surprise                     |
|  | Sydney    | 2014-36                   | vfno, father, spring, around, vogue                 |
|  | Budapest  | 2015-14, 2016-12          | budapest, una, of, travel, picoftheday              |
|  | Berlin    | 2015-01                   | berlin, germany, crazy, gopro, eurotrip             |
|  | Singapore | 2014-47, 2014-48, 2015-47 | prom, ever, picture, best, part                     |
|  | Berlin    | 2015-33                   | us, welcome, summer2015, mauerpark, berlinerdom     |

| Images                                                                              | City      | Event week       | Top-5 words in caption                                        |
|-------------------------------------------------------------------------------------|-----------|------------------|---------------------------------------------------------------|
|    | Tokyo     | 2015-21          | not, fashion, t2shibuya, t2, every                            |
|    | Kyiv      | 2013-37          | in, girls, friends, ukraine, kiev                             |
|    | Cairo     | 2015-18          | omarkhairat, we, concert, study, jesuitien                    |
|    | Kyiv      | 2013-39, 2013-40 | instagood, tagsforlikes, black, style, me                     |
|    | Vancouver | 2016-09          | canada, prime, minister, globe2016, his                       |
|    | Seattle   | 2013-39          | shrimps, outta, moose, amazonuw, school                       |
|    | Bangkok   | 2015-36          | congratulations, school, be, to, by                           |
|    | Paris     | 2013-48          | beauty, louloute, have, only, notredamede-paris               |
|   | Lagos     | 2014-46          | d2d, inspiration, motivation, livethedream, lenovo            |
|  | Paris     | 2013-52          | vacations, christmas, louvre, nice, good                      |
|  | Istanbul  | 2014-46          | 10kasm, mustafakemalatatrck, atam, anyoruz, burcuerdemwedding |
|  | Kolkata   | 2013-36          | sweet, bullride, bull, for, my                                |
|  | Istanbul  | 2015-16          | nn, fresh, use, selfiestick, havamis                          |
|  | Moscow    | 2013-38, 2014-41 | autumn, theatre, instasize, smile, instagood                  |
|  | Seattle   | 2015-19          | fancy, celebrating, starwars, spuspring, gas-works            |
|  | Austin    | 2015-12          | sxsw, sxsw2015, showcase, like, dope                          |
|  | Istanbul  | 2015-01          | year, all, turchia, awesome, var                              |
|  | London    | 2015-27          | wireless, instafollow, drake, missed, pre                     |



| Images                                                                              | City      | Event week       | Top-5 words in caption                     |
|-------------------------------------------------------------------------------------|-----------|------------------|--------------------------------------------|
|    | Kolkata   | 2013-48          | wid, week, tonight, signature, reunion     |
|    | Rio       | 2015-53          | ano, feliz2016, venha, copacabana, vem2016 |
|    | Rome      | 2014-42          | how, sonia, holaitalia, giro, gialle       |
|    | Bangkok   | 2013-51, 2013-52 | merry, christmas, mas, year, frank         |
|   | Kolkata   | 2015-01          | nye, new, year, happynewyear, years        |
|  | Bogota    | 2014-49          | night, eres, grado, no, mas                |
|  | Seattle   | 2015-02          | gohawks, 12s, starbucks, first, seahawks   |
|  | Sydney    | 2014-02          | boys, harbourbridge, fashion, love, walk   |
|  | Vancouver | 2013-49          | didn, december, outfit, ladies, afternoon  |
|  | Kolkata   | 2013-35          | insta, earth, center, budhgaya, at         |

Table 7: Top 100 events detected across the world by finding anomalous behaviour in style trends. The words from captions are sorted by their TF-IDF scores in the event week. Images from each event are sorted by the distance from the style cluster center

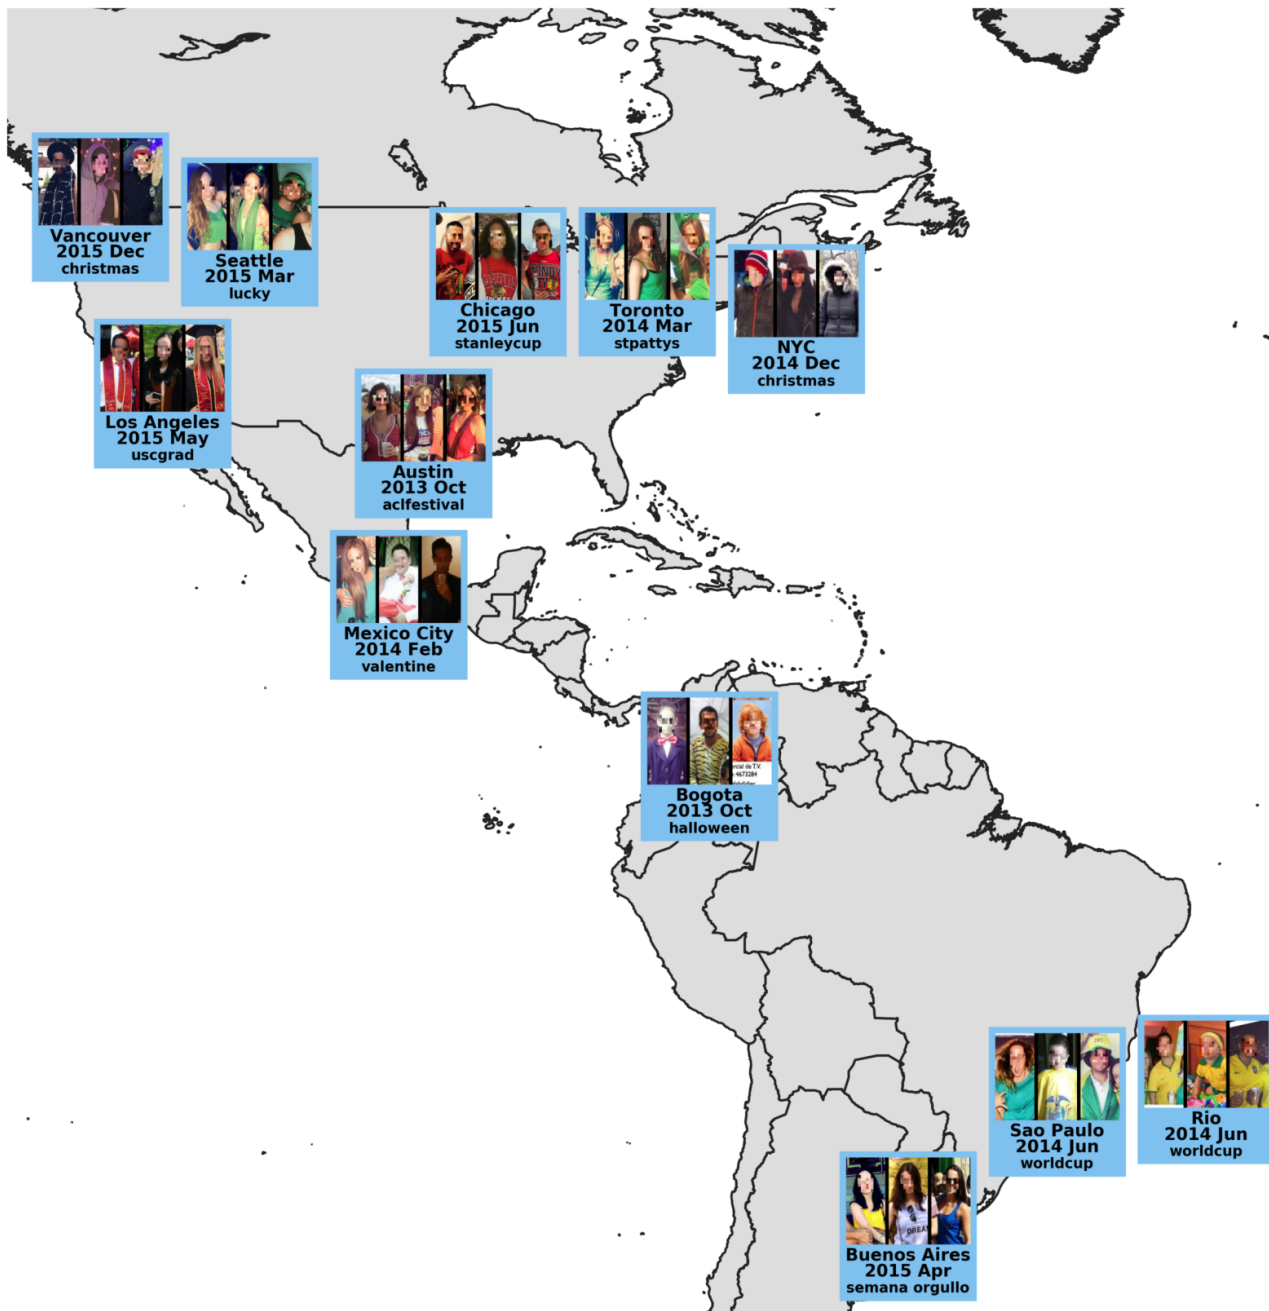

Figure 2: Major events discovered by our framework in North and South American cities. For each event the figure shows the clothes that people wear for the events, the city, one of the months of occurrence and the most descriptive word extracted using the captions of images.

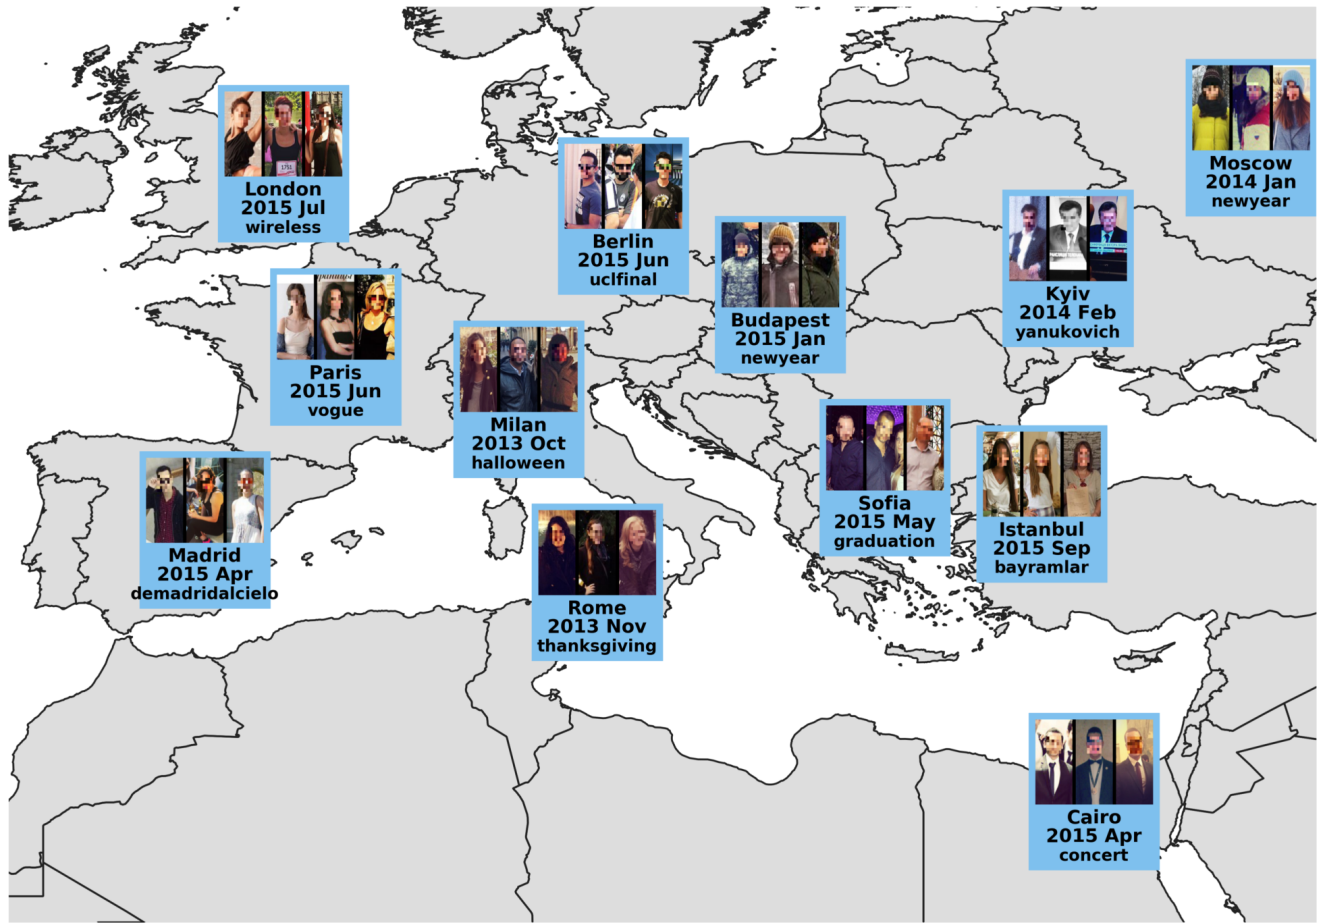

Figure 3: Major events discovered by our framework in European and North African cities (Events for rest of the African cities are shown in Figure 1 (Main paper)). For each event the figure shows the clothes that people wear for the events, the city, one of the months of occurrence and the most descriptive word extracted using the captions of images.

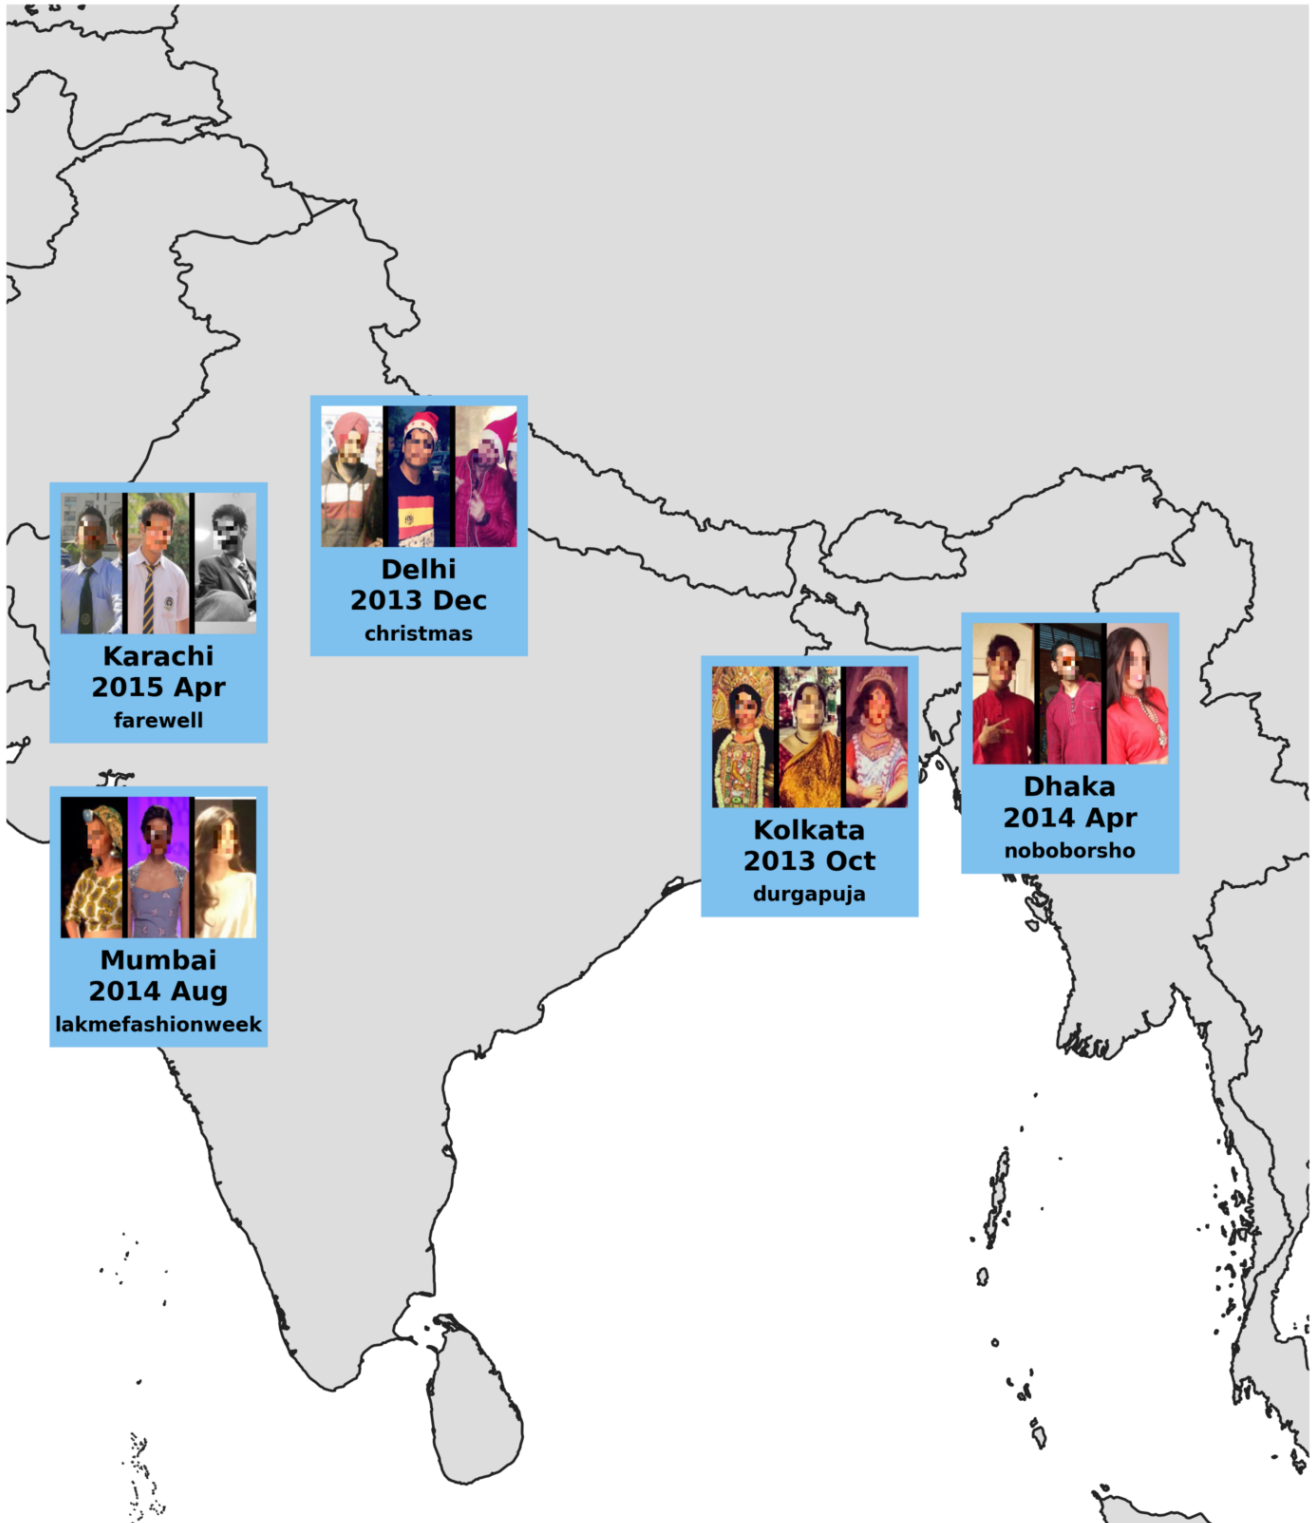

Figure 4: Major events discovered by our framework in South Asian cities. For each event the figure shows the clothes that people wear for the events, the city, one of the months of occurrence and the most descriptive word extracted using the captions of images.

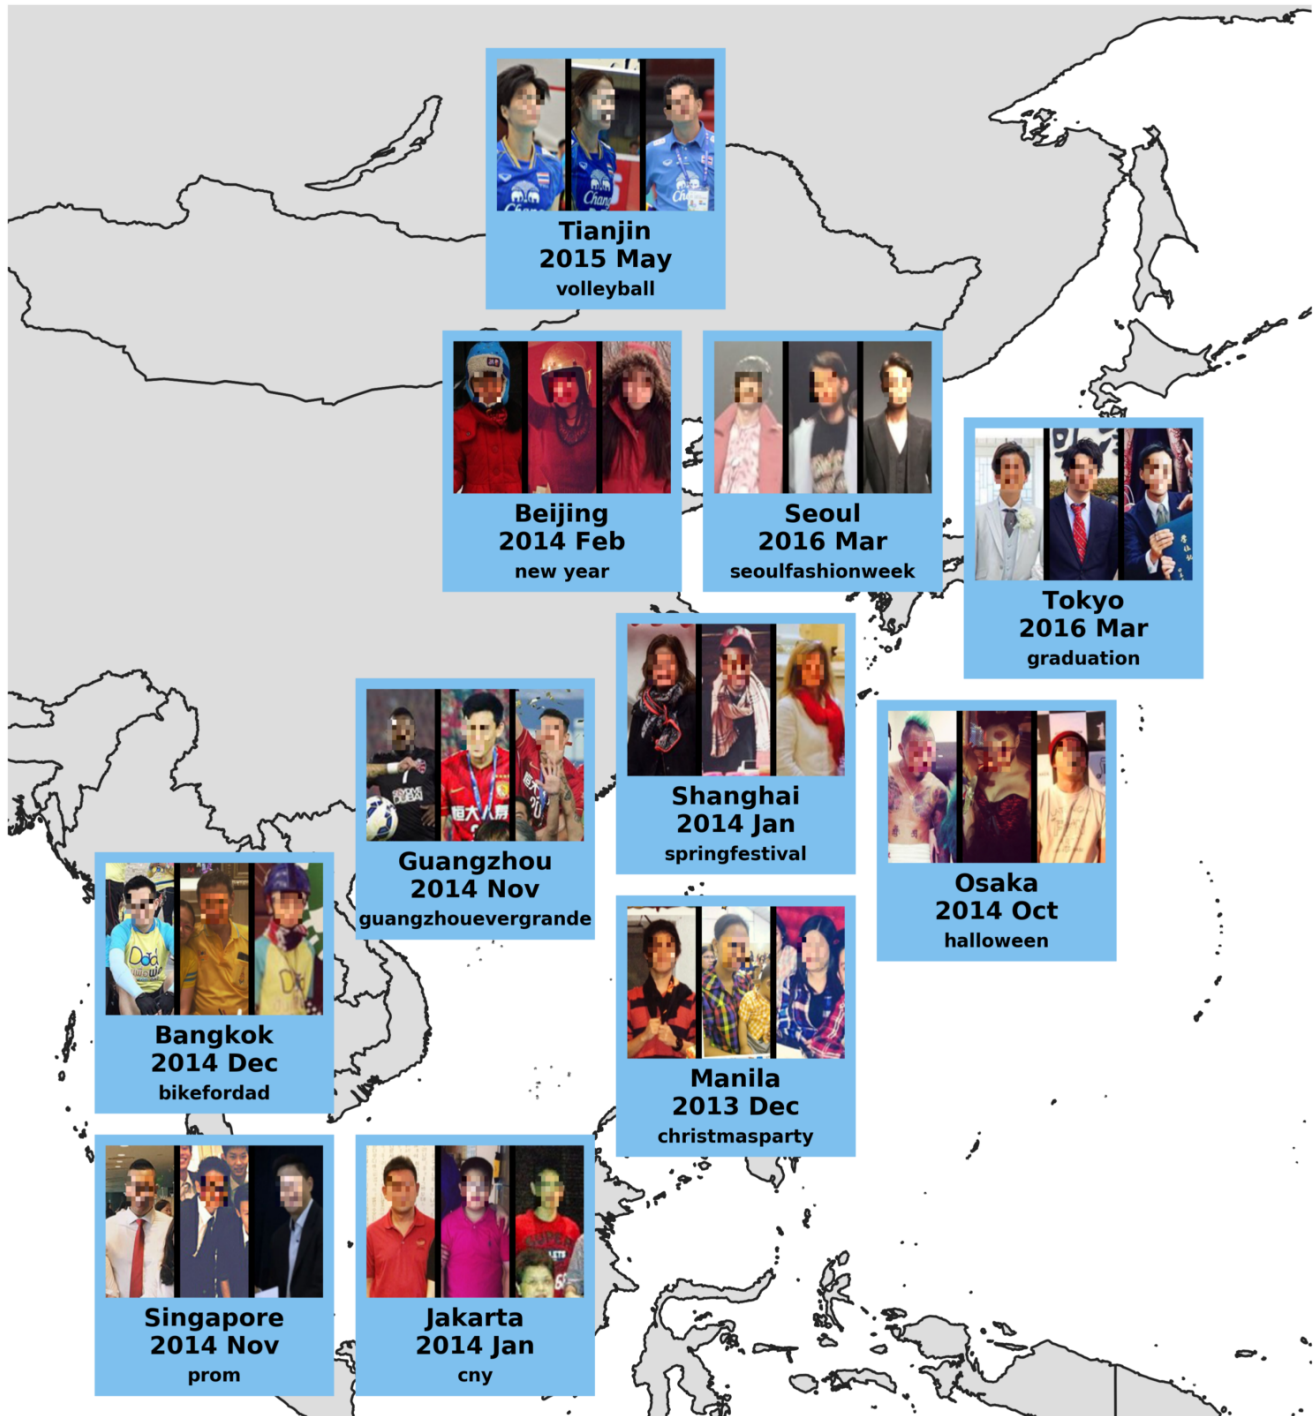

Figure 5: Major events discovered by our framework in South-East Asian cities. For each event the figure shows the clothes that people wear for the events, the city, one of the months of occurrence and the most descriptive word extracted using the captions of images.

## References

- [1] Wikipedia contributors. Lunisolar Calendar. 1



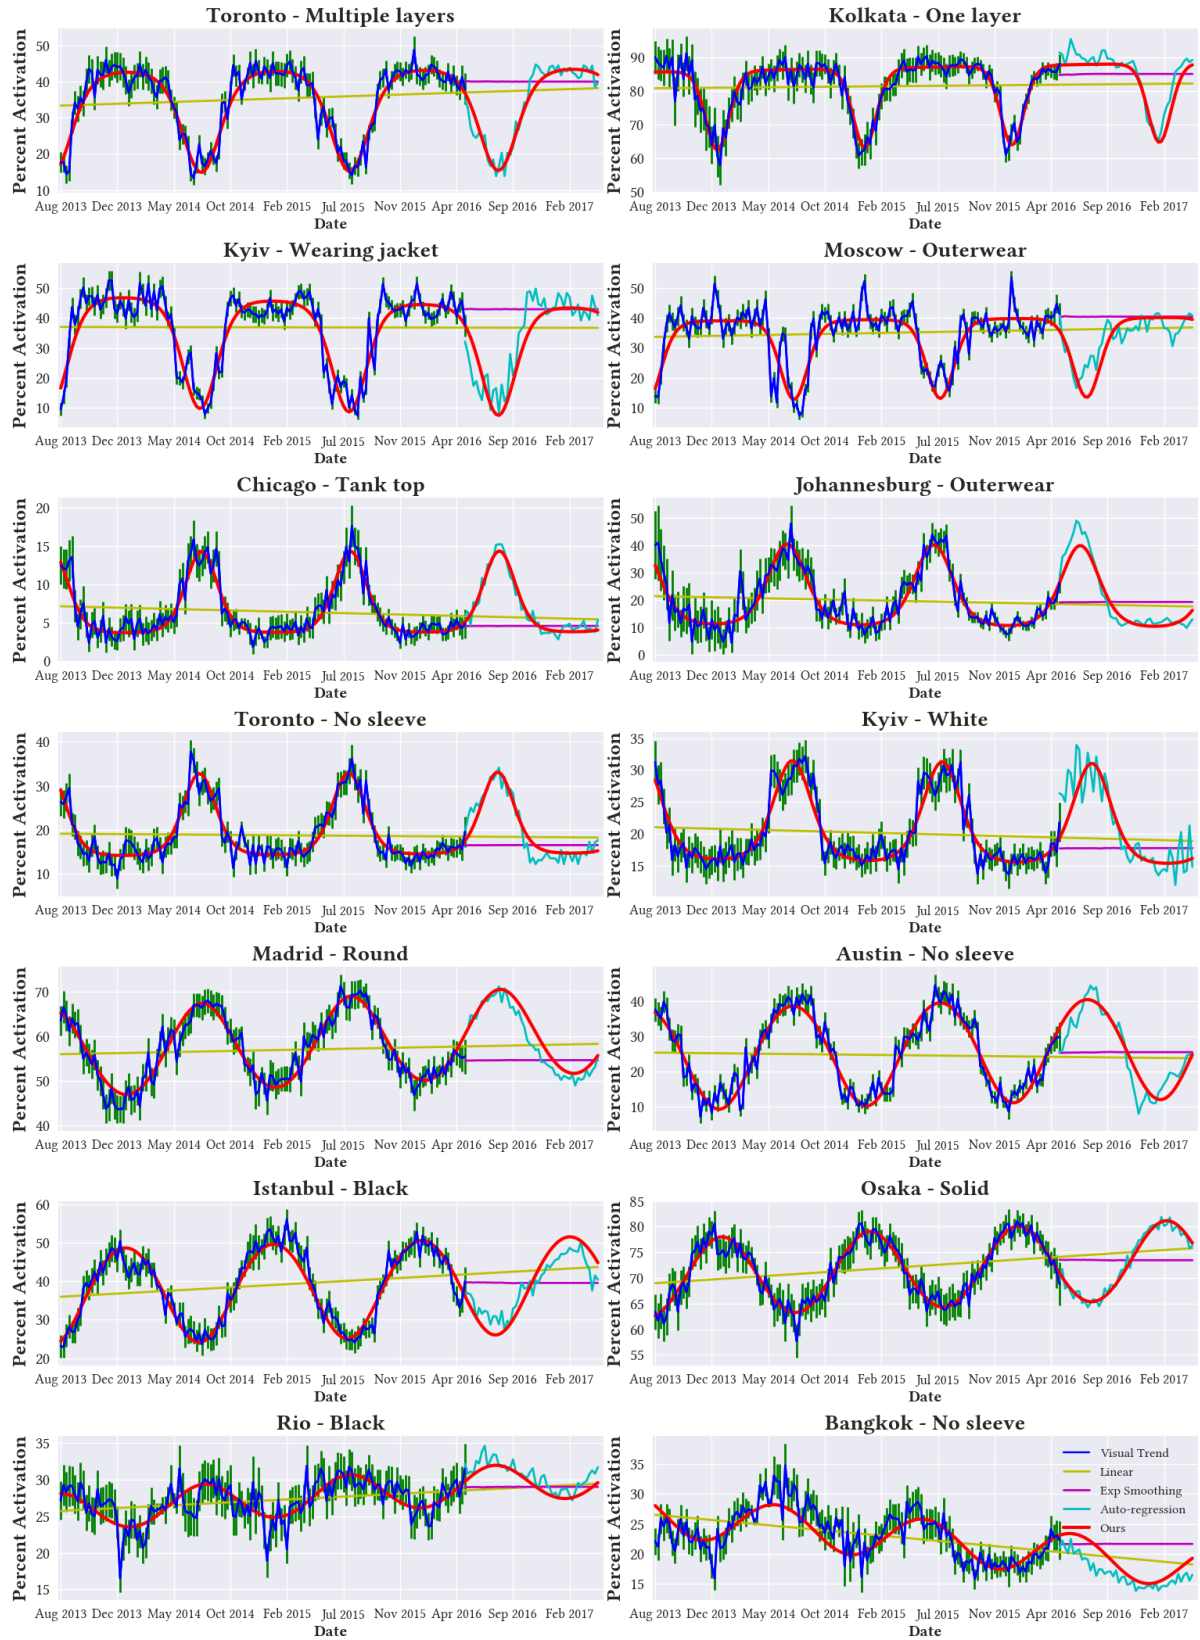

Figure 6: Some of the trends in different cities with our curve fits (Red). The top two rows show the trends with spikes downwards, the next two rows show trends with spikes upwards. The last three rows show trends following a sinusoidal pattern.
